# Supplementary material for: Mass flowering of the tropical tree Shorea beccariana was preceded by expression changes in flowering and drought-responsive genes
Source: PubMed Central journal article supplement (PMC3817532; doi:10.1111/mec.12344), 2013-05-08

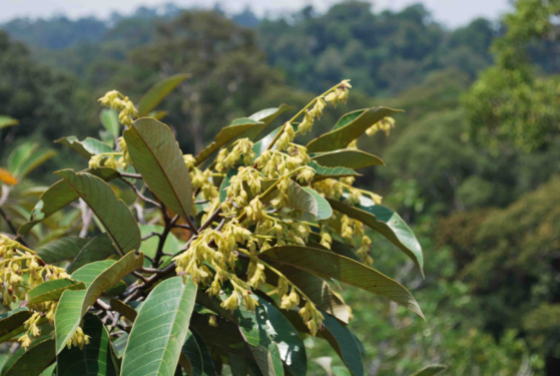

Supplement: mec0022-4767-SD1.pdf [file mec0022-4767-SD1.pdf]
