# Supplementary material for: Mass flowering of the tropical tree Shorea beccariana was preceded by expression changes in flowering and drought-responsive genes
Source: PubMed Central journal article supplement (PMC3817532; doi:10.1111/mec.12344), 2013-05-08
Supplement: mec0022-4767-SD2.pdf [file mec0022-4767-SD2.pdf]

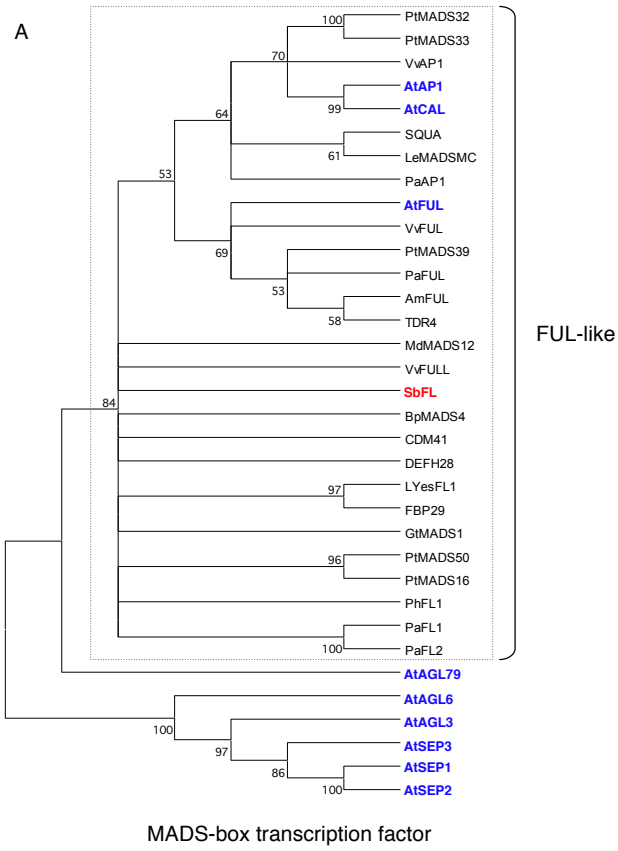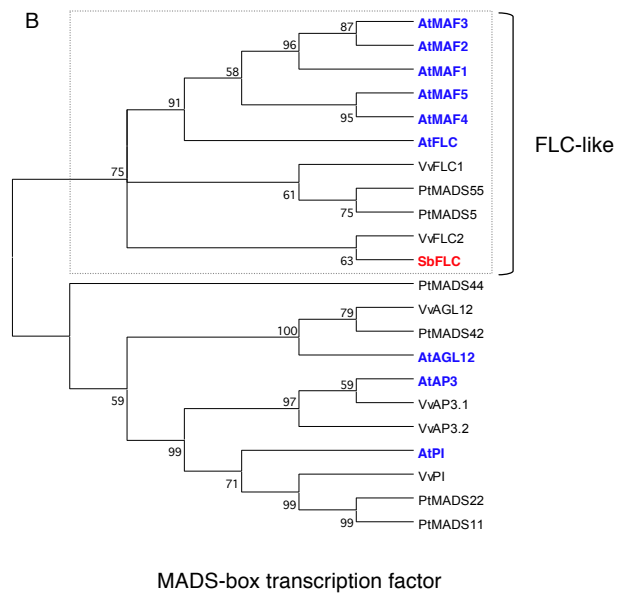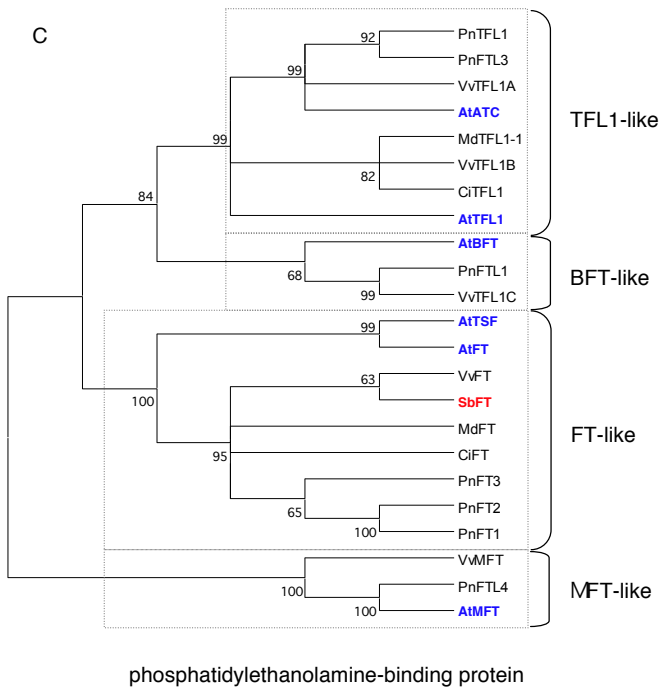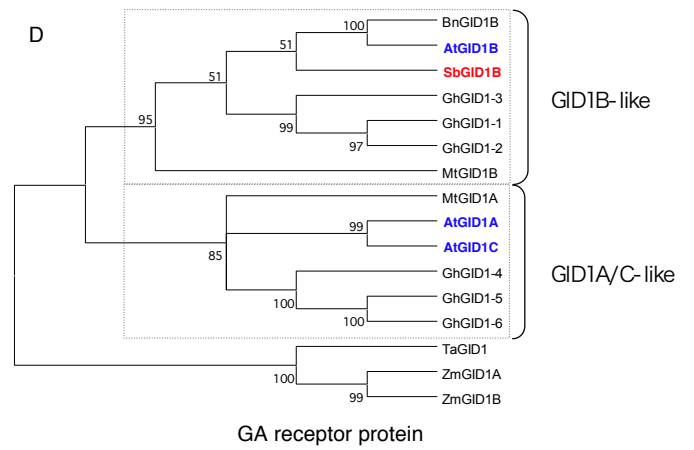

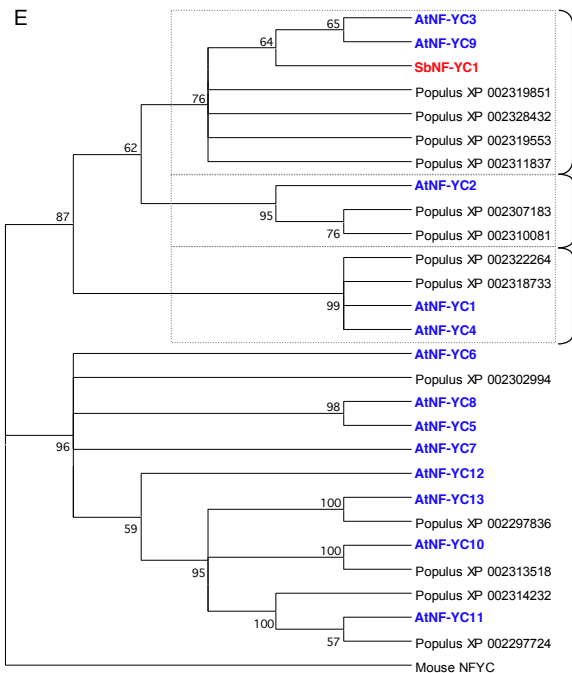

CCAAT box-recognizing transcription factor

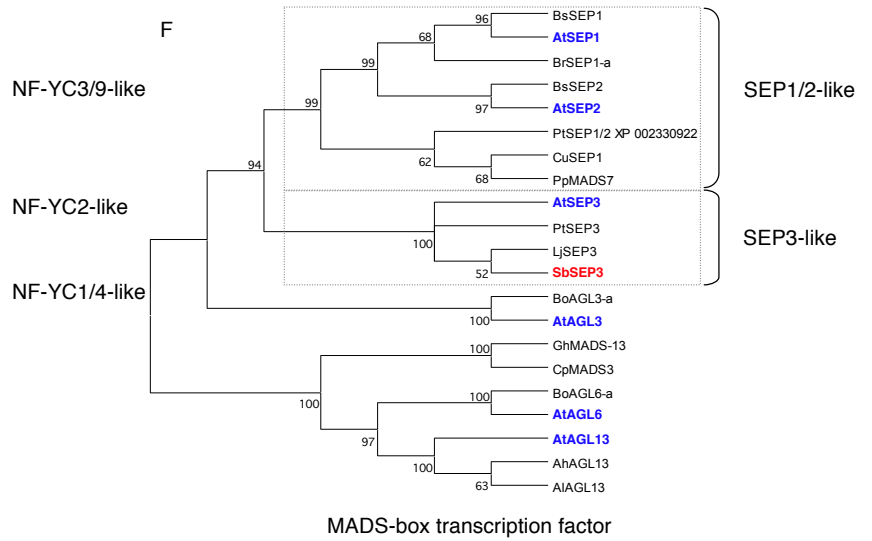

MADS-box transcription factor

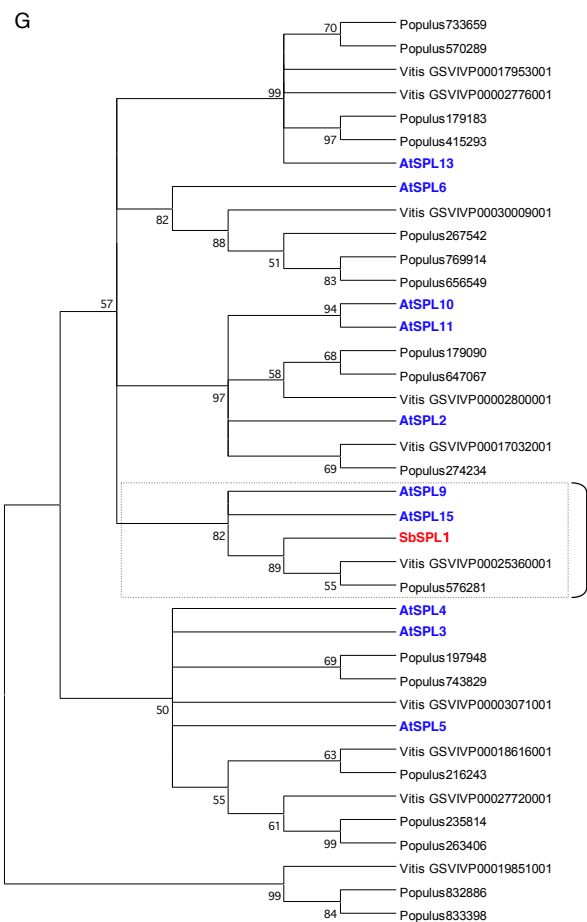

SQUAMOSA PROMOTER BINDING PROTEIN (SBP)-box transcription factor

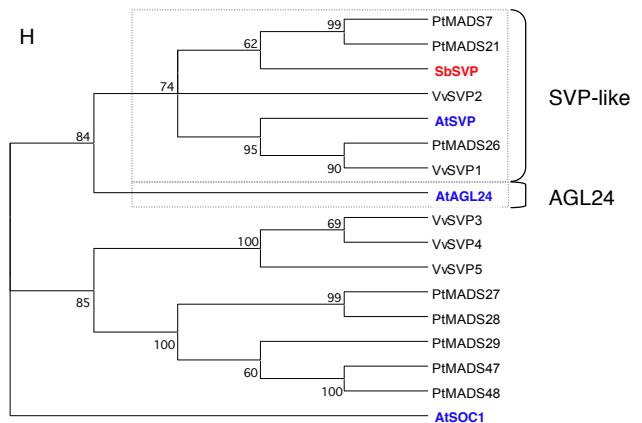

MADS-box transcription factor

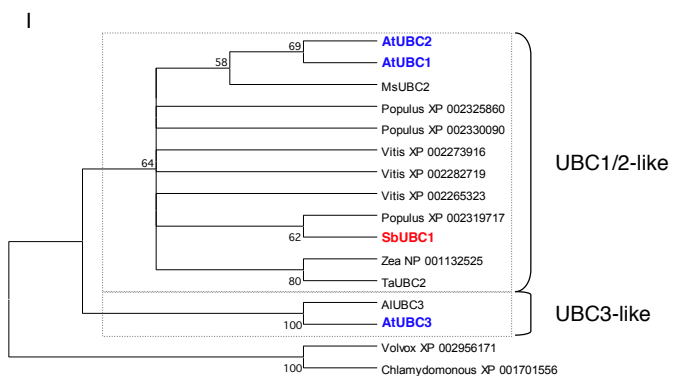

Ubiquitin conjugating enzyme
