# Supplementary material for: Mass flowering of the tropical tree Shorea beccariana was preceded by expression changes in flowering and drought-responsive genes
Source: PubMed Central journal article supplement (PMC3817532; doi:10.1111/mec.12344), 2013-05-08
Supplement: mec0022-4767-SD3.pdf [file mec0022-4767-SD3.pdf]

(A) Differentially expressed unigenes

Other contigs  
(All the contigs - differentially expressed unigenes)

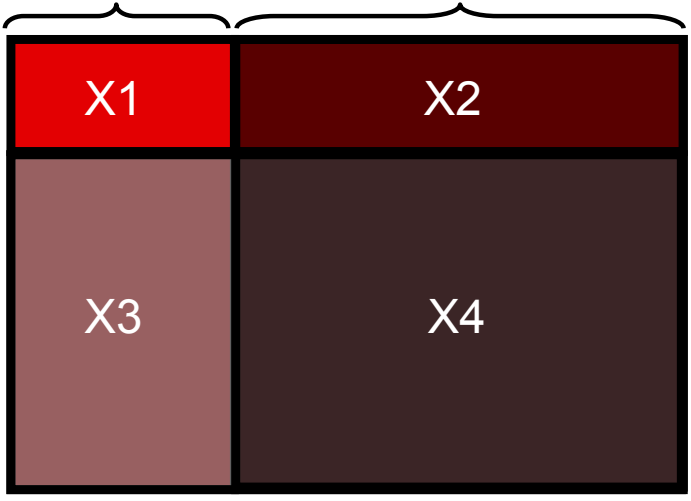

The contigs that are included in the **gene set  $A_k$**  of *A. thaliana*

The contigs that are **not** included in the **gene set  $A_k$**  of *A. thaliana*

(B) Differentially expressed unigenes in **cluster X**

Differentially expressed unigenes in **other clusters**

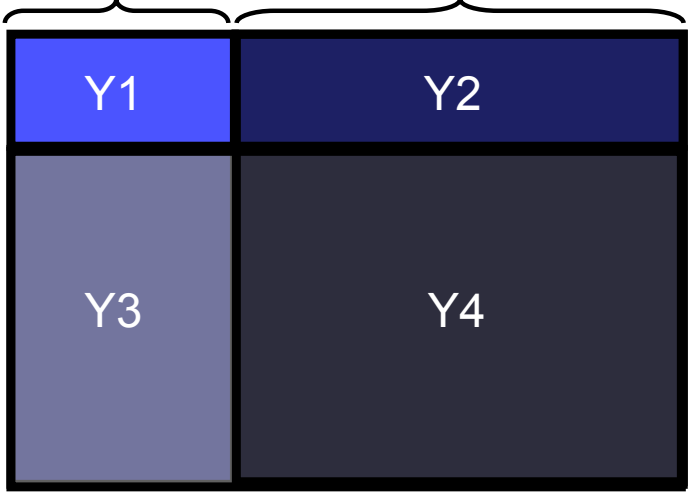

The differentially expressed unigenes that are included in the **gene set  $A_k$**  of *A. thaliana*

The differentially expressed unigenes that are **not** included in the **gene set  $A_k$**  of *A. thaliana*

(C) Differentially expressed unigenes in **group X divided by AIC**

Differentially expressed unigenes in **other groups**

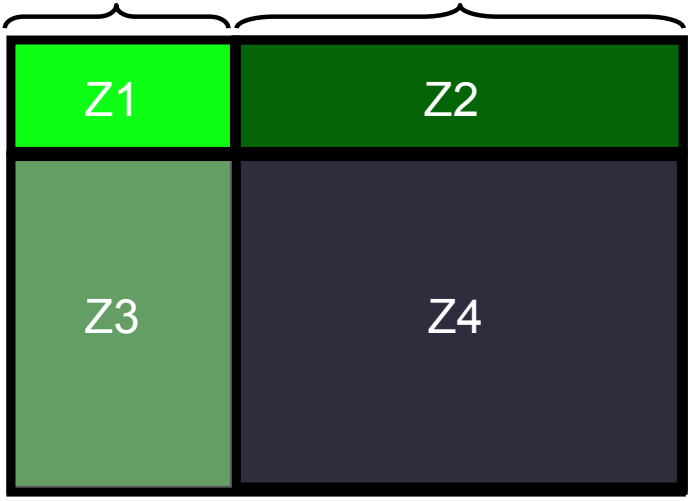

The differentially expressed unigenes that are included in the **gene set  $A_k$**  of *A. thaliana*

The differentially expressed unigenes that are **not** included in the **gene set  $A_k$**  of *A. thaliana*
