# Supplementary material for: Mass flowering of the tropical tree Shorea beccariana was preceded by expression changes in flowering and drought-responsive genes
Source: PubMed Central journal article supplement (PMC3817532; doi:10.1111/mec.12344), 2013-05-08

cluster I (79)

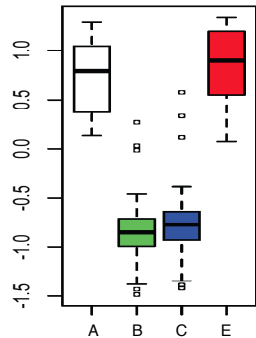

cluster II (157)

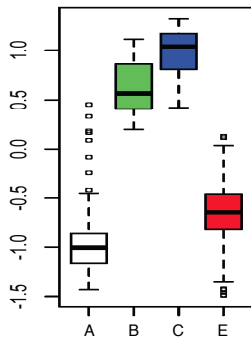

cluster III (233)

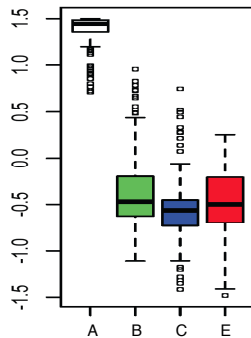

cluster IV (199)

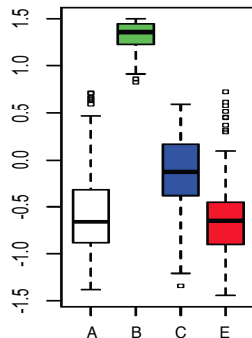

cluster V (136)

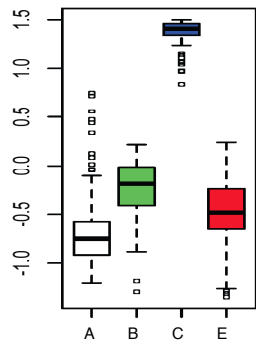

cluster VI (237)

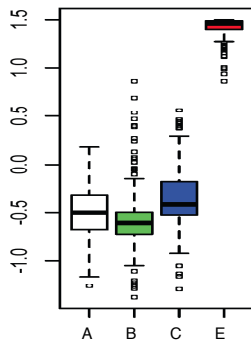

cluster VII (87)

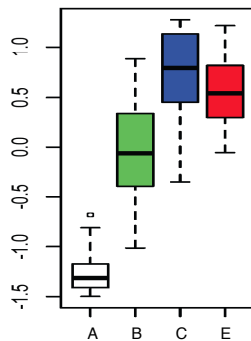

Supplement: mec0022-4767-SD4.pdf [file mec0022-4767-SD4.pdf]
