# Supplementary material for: Mass flowering of the tropical tree Shorea beccariana was preceded by expression changes in flowering and drought-responsive genes
Source: PubMed Central journal article supplement (PMC3817532; doi:10.1111/mec.12344), 2013-05-08

cluster I (102)

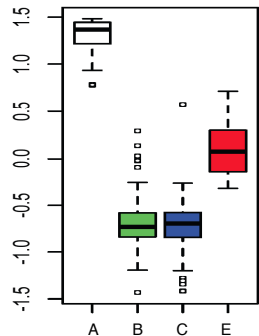

cluster II (71)

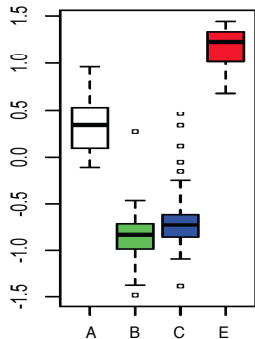

cluster III (157)

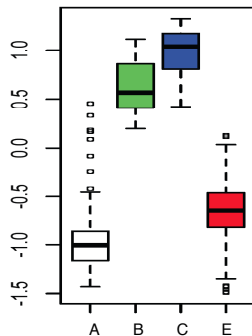

cluster IV (163)

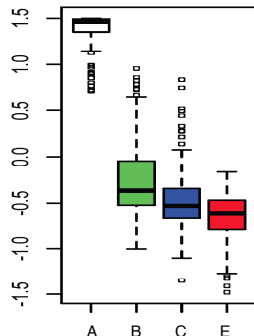

cluster V (198)

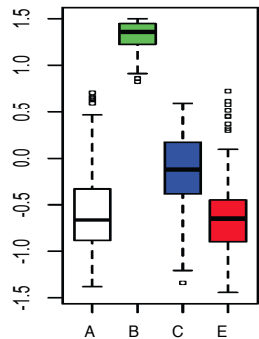

cluster VI (135)

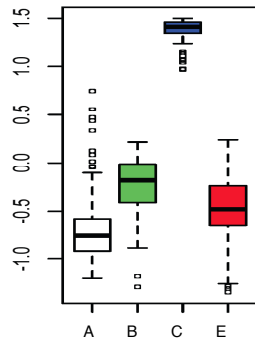

cluster VII (216)

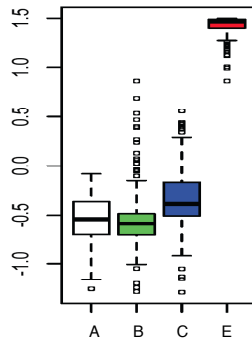

cluster VIII (86)

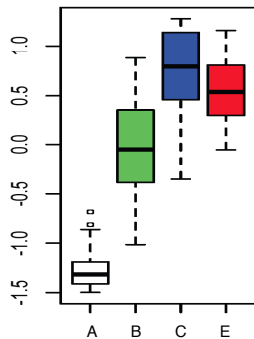

Supplement: mec0022-4767-SD5.pdf [file mec0022-4767-SD5.pdf]
