# Supplementary material for: Mass flowering of the tropical tree Shorea beccariana was preceded by expression changes in flowering and drought-responsive genes
Source: PubMed Central journal article supplement (PMC3817532; doi:10.1111/mec.12344), 2013-05-08
Supplement: mec0022-4767-SD6.pdf [file mec0022-4767-SD6.pdf]

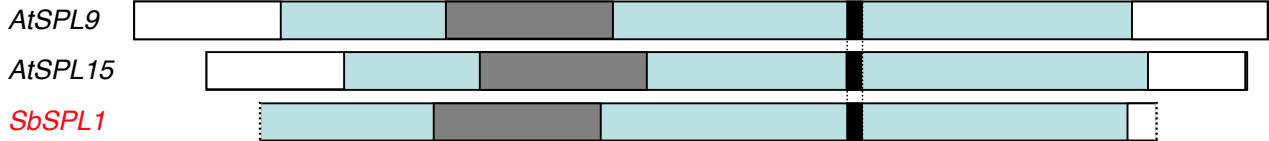

*AtSPL9*

*AtSPL15*

*SbSPL1*

*miR156*

GUGCUCUCUCUCUUCUGUCA

GUGCUCUCUCUCUUCUGUCA

GUGCUCUCUCUCUUCUGUCA

GUGCUCACUCUCUUCUGUCA
